# Supplementary material for: An l-cystine/l-cysteine impregnated nanofiltration membrane with the superior performance of an anchoring heavy metal in wastewater
Source: PubMed Central journal article supplement — RSC Adv. 2020 Jan 21;10(6):3438–49. doi: 10.1039/c9ra09380j (PMC9048764; doi:10.1039/c9ra09380j), 2020-01-21
Supplement: RA-010-C9RA09380J-s001.pdf [file RA-010-C9RA09380J-s001.pdf]

## Supporting Information

### **L-cystine/L-cysteine Impregnated Nanofiltration Membrane with Superior Performance of Anchoring Heavy Metal in Wastewater**

*Hong-Li Zhang, &† Huaqiang Cai, &§ Yu Xia,† Pan Zhang,† Si-Wei Xiong,† Jing-Gang Gai\*†*

*† State Key Laboratory of Polymer Materials Engineering, Polymer Research Institute of Sichuan University, Chengdu, Sichuan 610065, P. R. China*

*§ Institute of chemical materials, China academy of engineering physics, Mianyang 621900, PR China*

### **Supporting Figures and Tables**

---

\* Corresponding authors. Tel.: +86 28 85467166; fax: +86 28 85402465. E-mail addresses: gaijinggang@scu.edu.cn (J-G. Gai)

& These authors contributed equally to this work and should be considered co-first authors

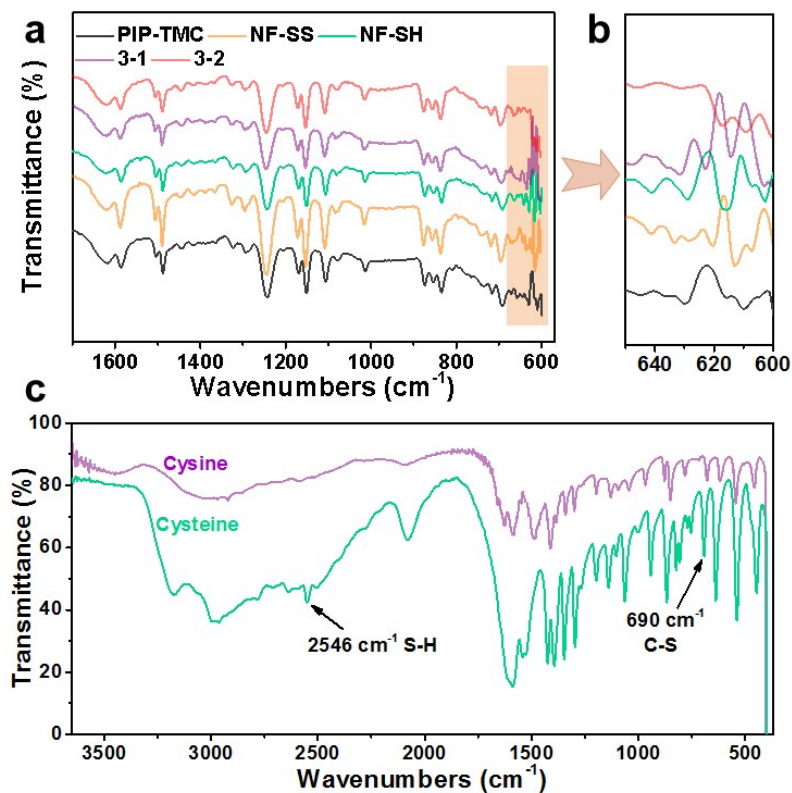

**Figure S1** (a) FT-ATR spectra and (b) the enlarged view of PIP-TMC, NF-SS, NF-SH, 3-1 and 3-2 NF active layers; (c) FT-IR spectra of L-cystine and L-cysteine monomers.

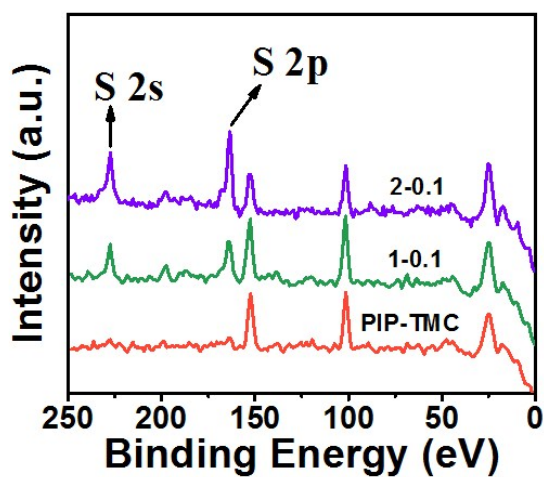

**Figure S2** Enlarged XPS spectra of PIP-TMC, NF-SS, NF-SH active layers in the range of binding energy of 0~ 250 eV.

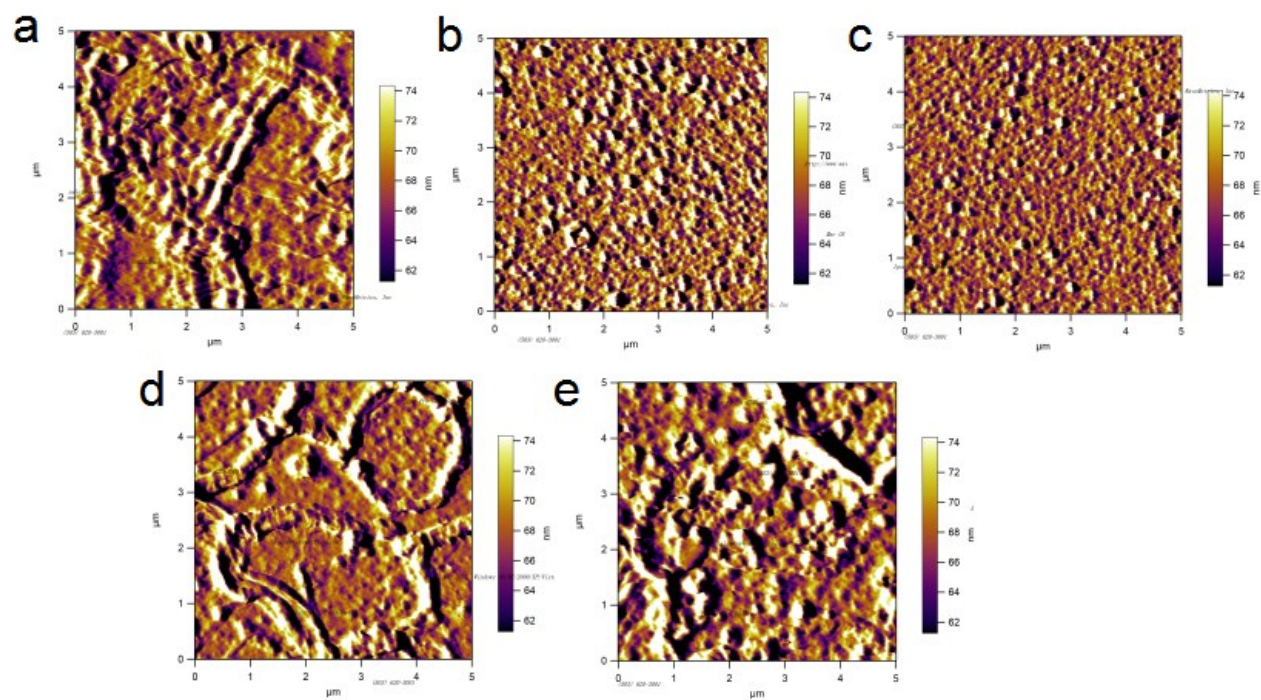

**Figure S3** Surface-sectional AFM images of (a) PIP-TMC, (b) NF-SS, (c) NF-SH, (d) 3-1, and (e) 3-2 active layers, respectively.

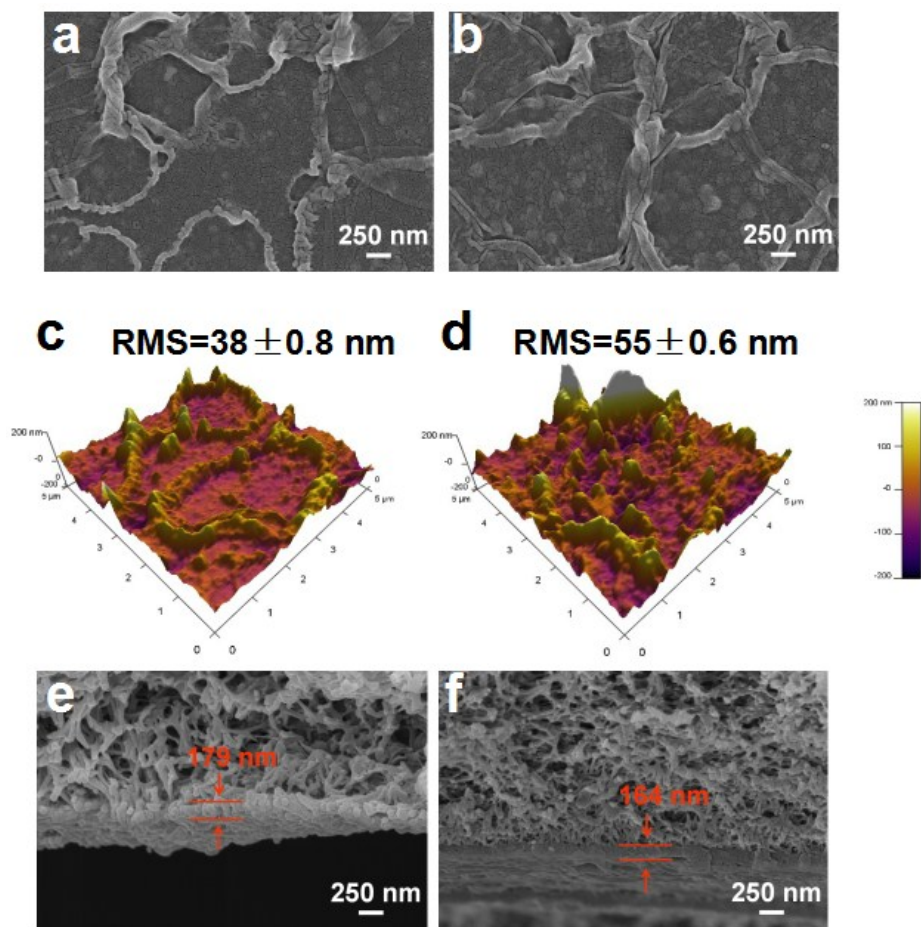

**Figure S4** (a, b)The surface-sectional SEM, (c, d) AFM and (e, f) cross sectional SEM images of **3-1** and **3-2** active layers.

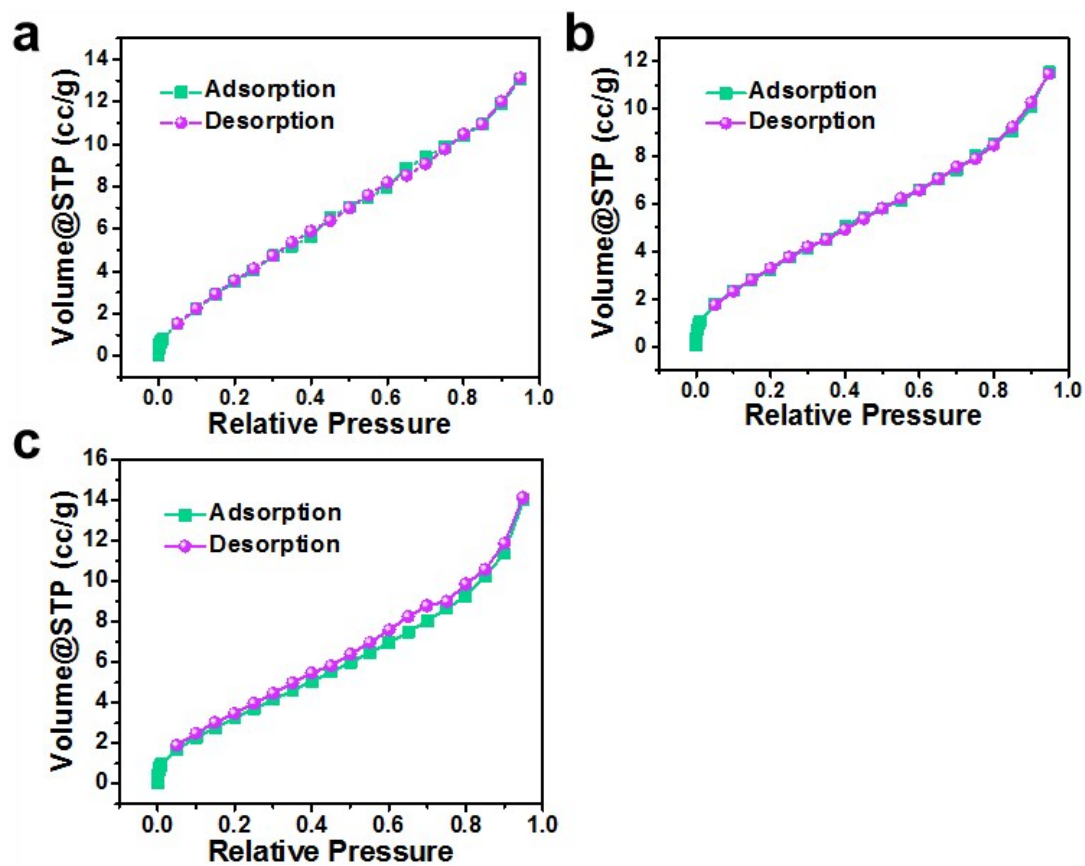

**Figure S5** Nitrogen-sorption isotherm curves of (a) PIP-TMC, (b) NF-SS and (c) NF-SH measured at 77 K.

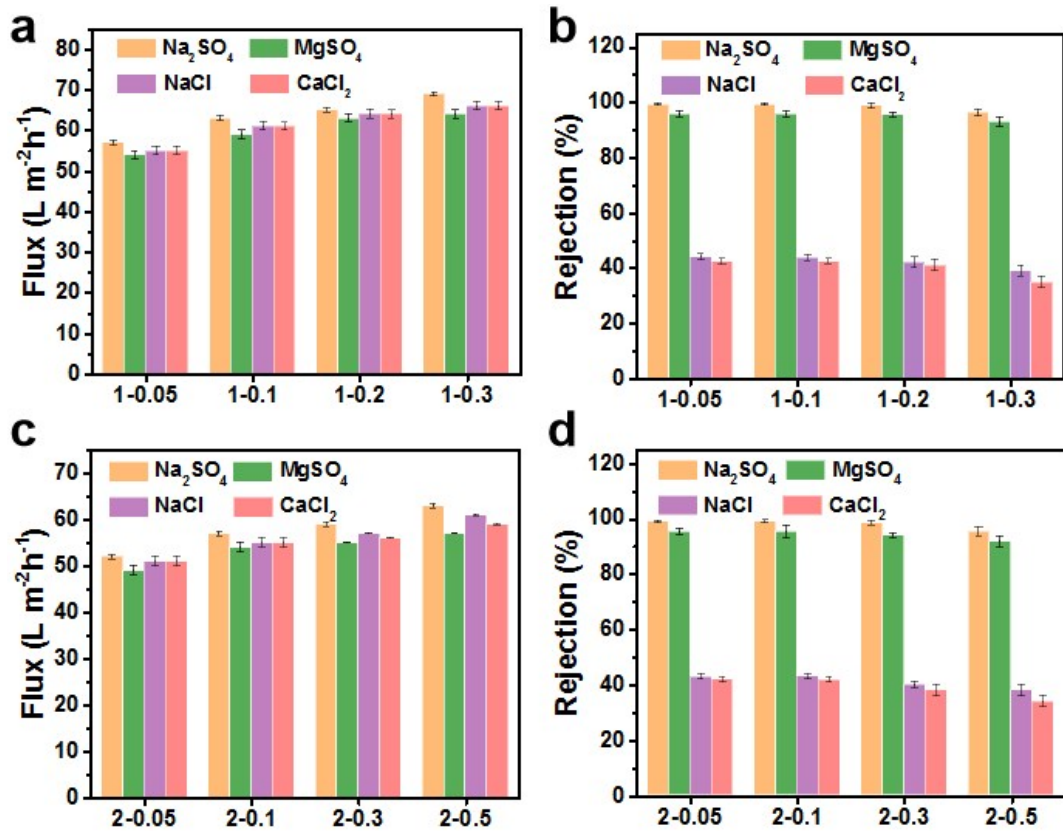

**Figure S6** (a, c) Water flux and (b, d) rejection added with different content L-cystine (1) and L-cysteine (2) for different salt aqueous solutions of 2000 ppm at 25 °C and 6 bar.

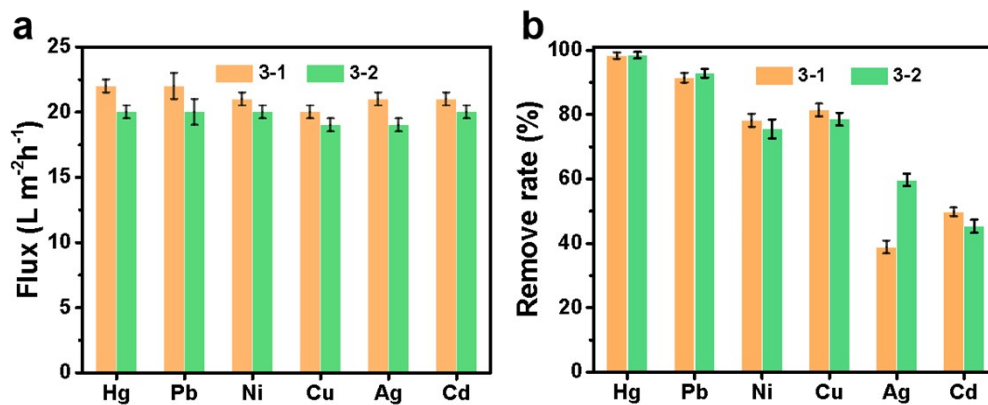

**Figure S7** (a) Water flux and (b) remove rate of 3-1 and 3-2 NF active layers for removing heavy metal ions from different aqueous solutions of 10 ppm at 25 °C and 6 bar.

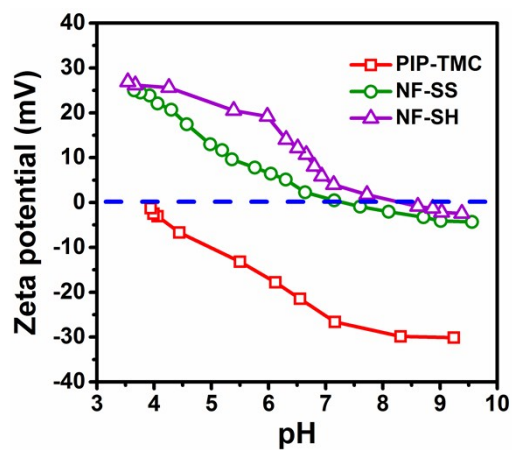

**Figure S8** Zeta potentials of PIP-TMC, NF-SS and NF-SH active layers with increasing pH values after 1 h filtration (where the Hg-S complex occurs).

**Table S1** Comparison of Hg(II) removal performance of state-of-the-art TFC NF membranes and other benchmark thiol/thio-functionalized porous materials .

| <b>Materials</b> | <b>Mechanism</b>    | <b>Hg(II) Remove efficiency (%)</b> | <b>Final Hg(II) Concentration (ppb)</b> | <b>Regeneration</b> | <b>Selectivity over Ca(II), Mg(II), Na(II)</b> | <b>Ref.</b>      |
|------------------|---------------------|-------------------------------------|-----------------------------------------|---------------------|------------------------------------------------|------------------|
| NF-SS            | Membrane filtration | 99.87                               | 1.8                                     | ✓                   | ✓                                              | <b>This work</b> |
| NF-SH            | Membrane filtration | 99.99                               | 0.18                                    | ✓                   | ✓                                              | <b>This work</b> |
| a: Modified MOF  | Adsorption          | 84.8                                | 3.05                                    | ✗                   | ✗                                              | S1               |
| b: MOF-74-Zn     | Adsorption          | 72.2                                | 13.9                                    | ✗                   | ✗                                              | S2               |
| c: TF-SCMNPs     | Adsorption          | 90                                  | 169*                                    | ✓                   | N.R                                            | 45               |
| d: Zr-DMBD       | Adsorption          | 90*                                 | 10                                      | N.R                 | N.R                                            | S3               |
| e: Cu-based MOF  | Adsorption          | 97.07                               | 19                                      | N.R                 | N.R                                            | S4               |



|                      |                     |        |         |      |      |     |
|----------------------|---------------------|--------|---------|------|------|-----|
| f: CBAP-1(AET)       | Adsorption          | 96     | 4*      | ✓    | ✓    | S5  |
| g: S-FMC-900         | Adsorption          | N. R.  | >10     | N.R  | N.R  | 46  |
| h: Mesoporous silica | Adsorption          | N. R.  | >4      | ✓    | N.R  | S6  |
| i: COF-S-SH          | Adsorption          | 99.94  | 0.73    | ✓    | ✓    | 38  |
| j: TAPB-BMTTPA-COF   | Adsorption          | 99.9%* | 10      | ✓    | ✓    | 39  |
| k: LHMS-1            | Ion exchange        | ~93-98 | 0.1-17  | ✓    | N.R. | S7  |
| l: PAF-1-SH          | Adsorption          | 99.9   | 0.4     | ✓    | ✓    | S8  |
| m: Fe-BTC/PDA        | Adsorption          | 99.8   | 1.2     | ✓    | ✓    | 40  |
| n: BioMOF            | Adsorption          | 99.95  | 5       | N.R. | ✓    | S9  |
| o: ZIF-90-SH         | Adsorption          | 96.35  | 36.5    | N.R. | N.R. | S10 |
| p: Hydrogel          | Ion exchange        | 99.9   | 0.17    | ✓    | ✗    | S11 |
| q: Cellulose         | Membrane filtration | 55     | 121950* | ✗    | ✗    | S12 |

---

membrane

---

x indicates it was not achieved under the conditions tested; ✓ implies this parameter was tested and showed reasonable performance; N. R. implies that the parameter was not reported and could not be calculated from the presented data; \* implies the parameter was calculated from the presented data.

a. Modified MOF, a novel acylamide- and hydroxyl-functionalized MOF material as a high-capacity and collectable adsorbent could remove Hg(II) from aqueous solutions, especially for ultratrace Hg<sup>2+</sup> ions in the ppb magnitude.

b. MOF-74-Zn, Zn<sub>2</sub>(DHBDC)(DMF)<sub>2</sub> • (H<sub>2</sub>O)<sub>2</sub> (DHBDC: 2,5-dihydroxy-1,4-benzenedicarboxylic acid) was employed. The MOF adsorbent showed high removal rate of Hg(II) from water, especially for the ultra-low-concentration Hg(II) ions in the ppb magnitude with the removal rate reaching to 54.48%, 69.71%, 72.26% when the initial concentration of Hg(II) is 20 ppb, 40 ppb, 50 ppb, respectively.

c. TF-SCMNPs, a thiol- functionalised silica-coated magnetite nanoparticles.

d. Zr-DMBD is a thiol-laced MOF (where DMBD<sub>2</sub>= 2,5-dimercapto-1,4-benzenedicarboxyate).

e. Cu-based MOF, thiol-functionalization of MOFs by choosing a well known three-dimensional (3D) Cu-based MOF, i.e. [Cu<sub>3</sub>(BTC)<sub>2</sub>(H<sub>2</sub>O)<sub>3</sub>]<sub>n</sub> (HKUST-1, BTC = benzene-1,3,5-tricarboxylate)

f. CBAP-1, a highly porous organic polymer was functionalized with either ethylenediamine (EDA) or 2-aminoethanethiol (AET) for Hg<sup>2+</sup> removal from water medium. It could efficiently remove >96% of Hg<sup>2+</sup> ions in 2 min from a 100 ppm of Hg<sup>2+</sup> solution.

g. S-FMC-900, a sulfur-functionalized mesoporous carbon.

h. Mesoporous silica, a thiol-silica hybrid mesoporous materials. Alkylthiols [tris(methoxy)mercaptopropylsilane, TMMPS] as the functional monolayers were covalently bound to mesoporous supports.

i. COF-S-SH is a covalent organic framework. It can reach 99.94% of the adsorption capacity at equilibrium within 10 min, and was able to decrease Hg<sup>2+</sup> concentration from 5 ppm to 0.73 ppb within 30 min of contact in the presence of a very small amount of adsorbent (V/m at 46500 mL g<sup>-1</sup>). Prolonging the contact time to 3 h, the Hg<sup>2+</sup> concentration was diminished below 0.1 ppb for Hg.

j. TAPB-BMTTPA-COF, to prepare the hexagonal TAPB-BMTTPA-COF, 1,3,5-tris(4-aminophenyl)benzene (TAPB) was used as a knot and 2,5- bis(methylthio)terephthalaldehyde (BMTTPA) as linker. We observed extremely quick removal process, whereas over 99% of Hg(II)

ions was removed within 5 min. The purification process completes within 15 min and reduced the Hg(II) ions concentration from 10 ppm to 10 ppb.

k. LHMS-1 is a layered hydrogen metal sulfide with the chemical formula  $H_2xMnxSn_{3-x}S_6$  ( $x \frac{1}{4}$  0.11-0.25). It should be noted that while the material works in 2 minutes, it is only tested in 67 ppb solutions. To enhance the amount of Hg absorbed, the longer contact time of LHMS-1/water is need.

l. PAF-1-SH, also referred to as the mercury nanotrap, is a porous organic polymer. The resultant materials can efficiently remove 99.9% mercury and decrease the Hg(II) concentration in the solution to 0.4 ppb, but after 6h.

m. Fe-BTC/PDA, meta-organic framework/polymer composite.

n. BioMOF, a MOF with the formula  $CaCu_6[(S,S)\text{-methox}]_3(OH)_2(H_2O)\} \cdot 16H_2O$  that is decorated with thioalkyl chains.

o. ZIF-90-SH, a thiol-functionalized ZIF-90 with zeolitic imidazolate structure (ZIF-90-SH) employed as an adsorbent was effective in the treatment of low-concentrations of Hg (II) (10.0-0.1 mg L<sup>-1</sup>) resulting in 96-98% removal of Hg (II) from aqueous solution.

p. Hydrogel, a novel hydrogel, immobilized of two polyelectrolytes, was able to reduce the concentration of Hg(II) from 200 and 500 ppb to 0.20 and 0.17 ppb, respectively, after 30 min.

q. Cellulose membrane is a diaminobutane based poly(propyleneimine) dendrimer functionalized with sixteen thiol groups, DAB-3-(SH)<sub>16</sub>, was successfully embeded in a swollen cellulosic support in order to achieve an easily handle engineered membrane for heavy metals removal.

## References

[1] F. Luo, J. L. Chen, L. L. Dang, W. N. Zhou, H. L. Lin, J. Q. Li, S. J. Liu, M. B. Luo, High-performance Hg<sup>2+</sup> removal from ultra-low concentration aqueous solution using both acylamide- and hydroxyl-functionalized metal-organic framework. *J. Mater. Chem. A* **2015**, 3, 9616-9620.

[2] Y. Y. Xiong, J. Q. Li, L. L. Gong, X. F. Feng, L. N. Meng, L. Zhang, P. P. Meng,

M. B. Luo, F. Lu, Using MOF-74 for Hg<sup>2+</sup> removal from ultra-low concentration aqueous solution. *J. Solid State Chem.* **2017**, 246, 16-22.

[3] K. K. Yee, N. Reimer, J. Liu, S. Y. Cheng, S.-M. Yiu, J. Weber, N. Stoc, Z. Xu, Effective mercury sorption by thiol-laced metal-organic frameworks: in strong acid and the vapor phase. *J. Am. Chem. Soc.* **2013**, 135, 7795-7798.

[4] F. Ke, L. G. Qiu, Y. P. Yuan, F. M. Peng, X. Jiang, A. J. Xie, Y. H. Shen, J. F. Zhu, Thiol-functionalization of metal-organic framework by a facile coordination-based postsynthetic strategy and enhanced removal of Hg<sup>2+</sup> from water. *J. Hazard. Mater.* **2011**, 196, 36-43.

[5] S. Ravi, P. Puthiaraj, K. H. Row, D. W. Park, W. S. Ahn, Aminoethanethiol-grafted porous organic polymer for Hg<sup>2+</sup> removal in aqueous solution. *Ind. Eng. Chem. Res.* **2017**, 56, 10174-10182.

[6] J. Liu, X. Feng, G. E. Fryxell, L. Q. Wang, A. Y. Kim, M. Gong, Hybrid mesoporous materials with functionalized monolayers. *Adv. Mater.* **1998**, 10, 161-165.

[7] M. J. Manos, V. G. Petkov, M. G. Kanatzidis, H<sub>2x</sub>M<sub>nx</sub>Sn<sub>3-x</sub>S<sub>6</sub> (x = 0.11-0.25): A novel reusable sorbent for highly specific mercury capture under extreme pH conditions. *Adv. Funct. Mater.* **2009**, 19, 1087-1092.

[8] B. Li, Y. Zhang, D. Ma, Z. Shi, S. Ma, Mercury nano-trap for effective and efficient removal of mercury(II) from aqueous solution. *Nat. Commun.* **2014**, 5, 5537.

- [9] M. Mon, F. Lloret, J. Ferrando-Soria, C. Martí-Gastaldo, D. Armentano, E. Pardo, Selective and Efficient Removal of Mercury from Aqueous Media with the Highly Flexible Arms of a BioMOF. *Angew. Chem. Int. Ed.* **2016**, 55, 11167-11172.
- [10] S. Bhattacharjee, Y. R. Lee, W. S. Ahn, Post-synthesis functionalization of a zeolitic imidazolate structure ZIF-90: a study on removal of Hg(II) from water and epoxidation of alkenes. *Cryst. Eng. Comm.* **2015**, 17, 2575-2582.
- [11] M. A. Mazumder, M. T. Alhaffar, S. A. Ali, Immobilization of two polyelectrolytes leading to a novel hydrogel for high performance Hg<sup>2+</sup> removal to ppb and sub-ppb levels. *Chem. Eng. J.* **2018**, 334, 1440-1454.
- [12] M. Algarra, M. I. Vázquez, B. Alonso, C. M. Casado, J. Casado, J. Benavente, Characterization of an engineered cellulose based membrane by thiol dendrimer for heavy metals removal. *Chem. Eng. J.* **2014**, 253, 472-477.
